# Supplementary material for: Effects of vitamins K2 and D3 supplementation in patients with severe coronary artery calcification: a study protocol for a randomised controlled trial
Source: PubMed Central journal article supplement — BMJ Open. 2023 Jul 14;13(7):e073233. doi: 10.1136/bmjopen-2023-073233 (PMC10351276; doi:10.1136/bmjopen-2023-073233), 2023-07-14
Supplement: bmjopen-2023-073233supp001.pdf [file bmjopen-2023-073233supp001.pdf]

## Appendix 1

| Ingredients of the placebo pill                 | Ingredients of the intervention pill            |
|-------------------------------------------------|-------------------------------------------------|
| Calciumphosphate E341                           | Calciumphosphate E341                           |
| Microcrystalline cellulose E460                 | Microcrystalline cellulose E460                 |
| Hydroxypropyl methylcellulose E464              | Hydroxypropyl methylcellulose E464              |
| Cross-linked sodium carboxymethylcellulose E468 | Cross-linked sodium carboxymethylcellulose E468 |
| Magnesium salts of fatty acids E470b            | Magnesium salts of fatty acids E470b            |
| Acacia gum E414                                 | Acacia gum E414                                 |
| Polyfructose                                    | Polyfructose                                    |
| Talc E553b                                      | Talc E553b                                      |
| Titanium dioxide E171                           | Titanium dioxide E171                           |
| Fatty acids E570                                | Fatty acids E570                                |
| Carnauba wax E903                               | Carnauba wax E903                               |
|                                                 | Vitamin K2                                      |
|                                                 | Vitamin D3                                      |
