# Supplementary material for: Effects of vitamins K2 and D3 supplementation in patients with severe coronary artery calcification: a study protocol for a randomised controlled trial
Source: PubMed Central journal article supplement — BMJ Open. 2023 Jul 14;13(7):e073233. doi: 10.1136/bmjopen-2023-073233 (PMC10351276; doi:10.1136/bmjopen-2023-073233), 2023-07-14
Supplement: bmjopen-2023-073233supp002.pdf [file bmjopen-2023-073233supp002.pdf]

Supplementary Table 1: Timeline and applied tests during the trial

|                                    | Month |   |   |   |    |    |    |    |    |
|------------------------------------|-------|---|---|---|----|----|----|----|----|
|                                    | 0     | 3 | 6 | 9 | 12 | 15 | 18 | 21 | 24 |
| Informed consent and randomisation | X     |   |   |   |    |    |    |    |    |
| Medical interview                  | X     |   | X |   | X  |    | X  |    | X  |
| Web-based survey                   |       | X |   | X |    | X  |    | X  |    |
| Biochemical measurements           | X     |   | X |   | X  |    | X  |    | X  |
| Biobank                            | X     |   |   |   | X  |    |    |    | X  |
| Non-contrast CT                    | X     |   |   |   | X  |    |    |    | X  |
| Contrast CT                        | X     |   |   |   |    |    |    |    | X  |
